# Supplementary material
Source: publisher figshare collection journal article supplement (https://karger.figshare.com/ndownloader/files/31518875)
Supplement: Supplementary file 1 [file 31518875]

Supplementary Table 1. Patient characteristics among 493 colorectal cancer patients

|  |  | n (%) | HR1 | 95% CI | *p* value |
| --- | --- | --- | --- | --- | --- |
| Gender | |  |  |  |  |
|  | Female | 219 (44) |  |  |  |
|  | Male | 274 (56) | 1.03 | 0.77–1.38 | 0.839 |
| Age (in years) | |  |  |  |  |
|  | ≤66 | 238 (48) |  |  |  |
|  | >66 | 255 (52) | **1.66** | **1.24–2.22** | **0.001** |
| Stage | |  |  |  |  |
|  | I | 76 (15) |  |  |  |
|  | II | 171 (35) | **2.34** | **1.14–4.80** | **0.021** |
|  | III | 164 (33) | **4.43** | **2.21–8.86** | **<0.001** |
|  | IV | 82 (17) | **17.4** | **8.60–35.20** | **<0.001** |
| Histological type | |  |  |  |  |
|  | Nonmucinous adenocarcinoma | 443 (90) |  |  |  |
|  | Mucinous adenocarcinoma | 44 (9) | **2.45** | **1.44–4.16** | **0.001** |
|  | Missing | 6 (1) |  |  |  |
| Location | |  |  |  |  |
|  | Right colon | 143 (29) |  |  |  |
|  | Left colon | 113 (23) | 1.41 | 0.93–2.14 | 0.109 |
|  | Rectum | 237 (48) | 1.21 | 0.84–1.74 | 0.308 |
| Abbreviations: HR, hazard ratio; 95% CI, 95% confidence interval; CEA, carcinoemryonic antigen. | | | | | |
| 1First subgroup used as the reference group. | | |  |  |  |
